# Supplementary material for: Type III interferon drives thymic B cell activation and regulatory T cell generation
Source: PubMed Central journal article supplement — Proc Natl Acad Sci U S A. 2023 Feb 21;120(9):e2220120120. doi: 10.1073/pnas.2220120120 (PMC9992806; doi:10.1073/pnas.2220120120), 2023-02-21
Supplement: pnas.2220120120.sapp.pdf [file pnas.2220120120.sapp.pdf]

## **Supporting Information for**

### **Type III interferon drives thymic B cell activation and regulatory T cell generation**

Ryan J. Martinez, Elise R. Breed, Yosan Worota, Katherine M. Ashby, Matouš Vobořil, Tailor Mathes, Oscar C. Salgado, Christine H. O'Connor, Sergei V. Kotenko, and Kristin A. Hogquist

Kristin A. Hogquist  
Email: hogqu001@umn.edu

#### **This PDF file includes:**

- Supporting text
- Figures S1 to S5
- Tables S1
- SI References

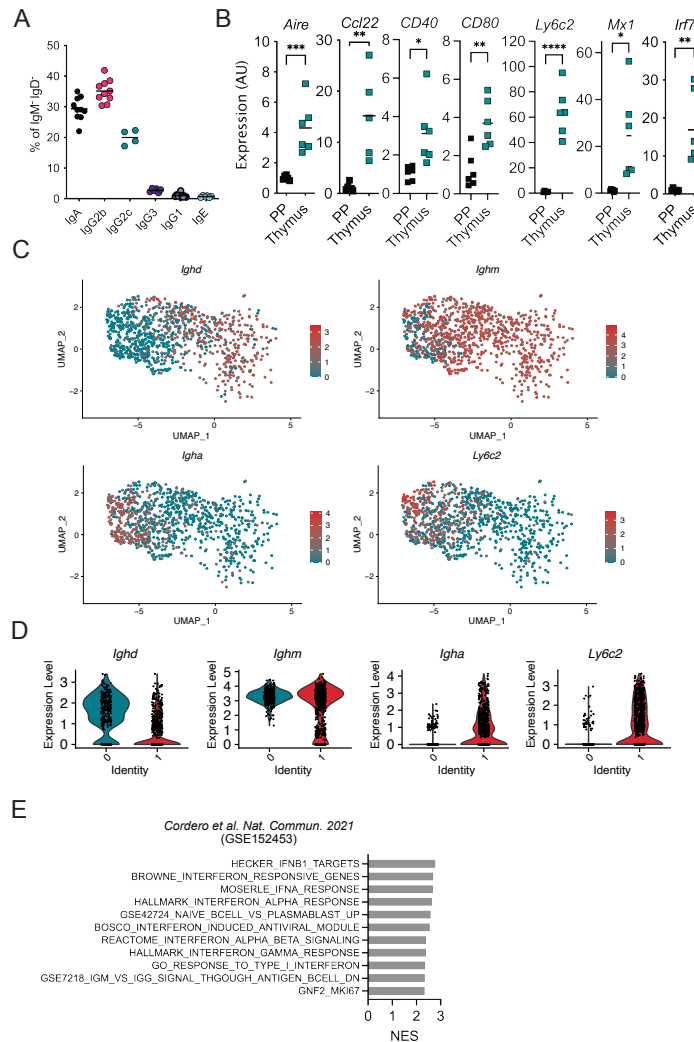

**Figure S1** Phenotype of activated and licensed thymic B cells. **(A)** Quantification of the proportion of individual isotypes in the isotype class-switched IgM<sup>+</sup>IgD<sup>-</sup> thymic B cell population. **(B)** RT-qPCR of *Aire*, *Ccl22*, *CD40*, *CD80*, *Ly6c2*, *Mx1* and *Irf7* in sorted IgM<sup>+</sup>IgD<sup>-</sup> B cells from thymus (blue) and PP (black) normalized to *Gapdh*. **(C)** Feature plots of *Ighd*, *Ighm*, *Igha* and *Ly6c2* for thymic B cells from scRNA-seq data. **(D)** Violin plots of thymic B cell scRNA-Seq for *Ighd*, *Ighm*, *Igha* and *Ly6c2* separated by cluster. **(E)** Gene set enrichment analysis NES for ranked RNA-Seq data from GSE152453. Positive NES are pathways over-represented by thymic B cells (CD21<sup>+</sup>CD35<sup>+</sup>) compared to cord blood B cells.

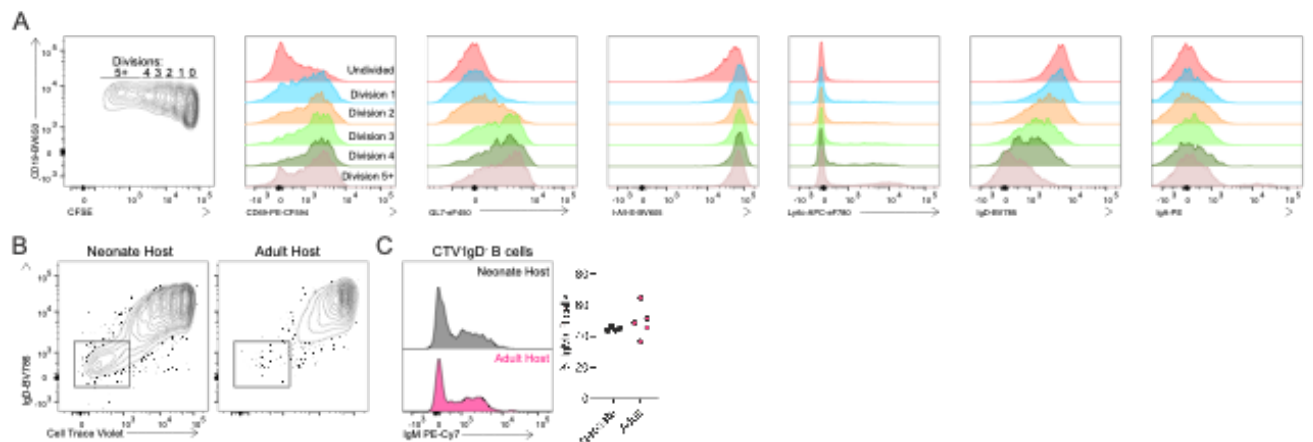

**Figure S2** Phenotype of transferred splenic B cells in the thymic microenvironment. **(A)** Flow cytometry plots of transferred splenic B cells separated by division. Flow cytometric histograms demonstrate expression of activation and isotype class-switching markers CD69, GL7, I-A/I-E, Ly6c, IgD, IgA as a function of division. **(B)** Flow cytometry of splenic B cells following intrathymic transfer showing IgD and Cell Trace Violet (CTV) expression in neonatal (left) and adult (middle) host mice with number adjacent to outlined areas identifying proportion of cells within the area. **(C)** Flow cytometry histograms of CTV-IgD<sup>-</sup> B cells identified in **(B)** showing IgM expression in neonatal (black) or adult (pink) hosts. Graphs on right show quantification of IgM<sup>+</sup> CTV-IgD<sup>-</sup> B cells following intrathymic transfer.

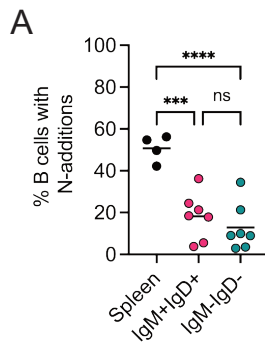

**Figure S3** Reduced N-nucleotide additions in thymic B cells. **(A)** Quantification of N-additions in the B cell repertoire of FACS sorted splenic or thymic switched and unswitched B cells from 3H9 mice (data from GSE85366). Each symbol represents an individual mouse; small horizontal lines indicate the group mean. \* $P \leq 0.05$ , \*\* $P \leq 0.01$ , \*\*\* $P \leq 0.001$  and \*\*\*\* $P \leq 0.0001$  (A One way ANOVA).

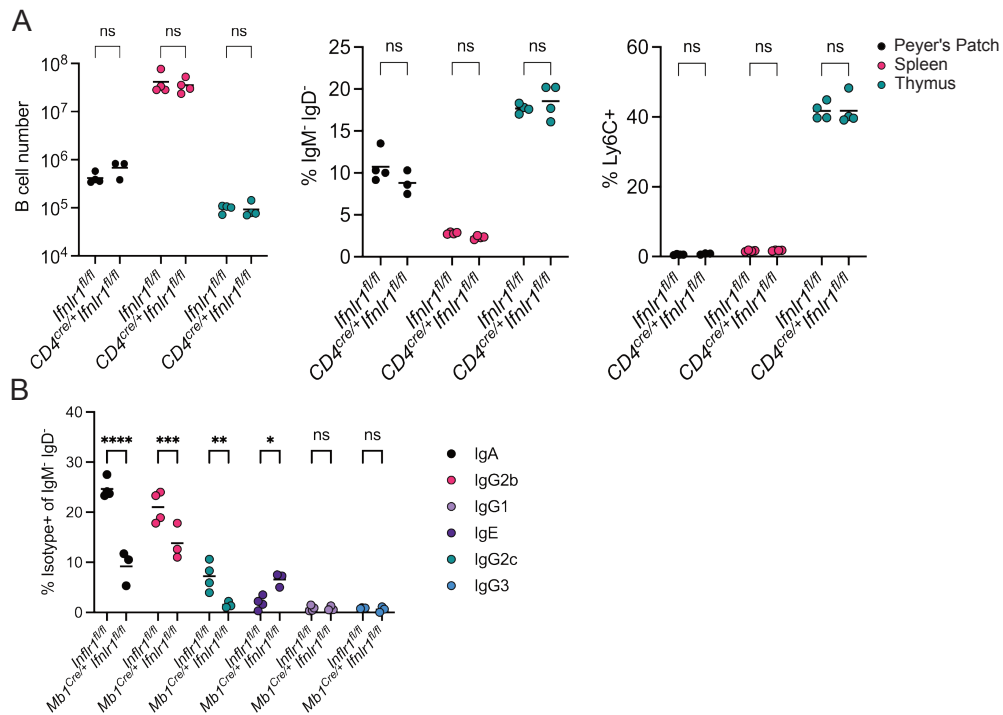

**Figure S4** Contribution of type III IFN signaling on T and B cells. **(A)** Quantification of the B cell number and proportion of isotype class-switched (IgM<sup>+</sup>IgD<sup>-</sup>) and Ly6c expressing B cells in *Ifnlr1*<sup>fl/fl</sup> and *Cd4*<sup>Cre/+</sup>*Ifnlr1*<sup>fl/fl</sup> mice from Peyer's Patch (black), spleen (pink) and thymus (aqua). **(B)** Quantification of the proportion of individual isotypes in the isotype class-switched IgM<sup>+</sup>IgD<sup>-</sup> thymic B cell population in *Ifnlr1*<sup>fl/fl</sup> and *Mb1*<sup>Cre/+</sup>*Ifnlr1*<sup>fl/fl</sup> mice. Each symbol **(A-B)** represents an individual mouse; small horizontal lines indicate the group mean. \*P ≤ 0.05, \*\*P ≤ 0.01, \*\*\*P ≤ 0.001 and \*\*\*\*P ≤ 0.0001 (**A,B** Two-way ANOVA with Sidak's multiple comparisons test).

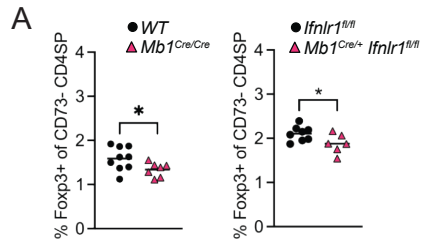

**Figure S5** Nascent CD73<sup>-</sup> Treg development in *Mb1<sup>Cre/Cre</sup>* and *Mb1<sup>Cre/+</sup> Ifnlr1<sup>fl/fl</sup>* mice. **(A)** Quantification of the proportion of Foxp3<sup>+</sup> Tregs of CD73<sup>-</sup> CD4SP thymocytes in *Mb1<sup>Cre/Cre</sup>* (left) and *Mb1<sup>Cre/+</sup> Ifnlr1<sup>fl/fl</sup>* (right) mice. Each symbol represents an individual mouse; small horizontal lines indicate the group mean. \*P ≤ 0.05, \*\*P ≤ 0.01, \*\*\*P ≤ 0.001 and \*\*\*\*P ≤ 0.0001 (Two-tailed unpaired Student's t-test).

|                                                                             | SOURCE                   | IDENTIFIER                                                  |
|-----------------------------------------------------------------------------|--------------------------|-------------------------------------------------------------|
| <b>Antibodies</b>                                                           |                          |                                                             |
| BUV395 Rat Anti-mouse CD45R/B220 (Clone: RA3 6B2)                           | BD Biosciences           | (BD Biosciences Cat# 563793, RRID:AB_2738427)               |
| FITC anti-mouse H-2K <sup>b</sup> Antibody (Clone: AF6-88.5)                | BioLegend                | (BioLegend Cat# 116506, RRID:AB_313733)                     |
| PerCP/Cyanine5.5 anti-mouse TCR $\beta$ chain Antibody (Clone: H57-597)     | BioLegend                | (BioLegend Cat# 109228, RRID:AB_1575173)                    |
| PE anti-mouse IgA Antibody (Clone: mA-6E1)                                  | Thermo Fisher Scientific | (Thermo Fisher Scientific Cat# 12-4204-82, RRID:AB_465917)  |
| PE-CF594 Hamster Anti-Mouse CD69 (Clone: H1.2F3)                            | BD Biosciences           | (BD Biosciences Cat# 562455, RRID:AB_11154217)              |
| PE/Cyanine7 anti-mouse IgM Antibody (Clone: RMM-1)                          | BioLegend                | (BioLegend Cat# 406514, RRID:AB_10642031)                   |
| BV786 Rat Anti-Mouse IgD (Clone: 11-26c.1)                                  | BD Biosciences           | (BD Biosciences Cat# 563618, RRID:AB_2738322)               |
| APC anti-mouse CD183 (CXCR3) Antibody (Clone: CXCR3-173)                    | BioLegend                | (BioLegend Cat# 126512, RRID:AB_1088993)                    |
| APC-eFluor 780 Ly-6C Antibody (Clone: HK1.4)                                | Thermo Fisher Scientific | (Thermo Fisher Scientific Cat# 47-5932-82, RRID:AB_2573992) |
| Alexa Fluor 700 CD38 Antibody (Clone: 90)                                   | Thermo Fisher Scientific | (Thermo Fisher Scientific Cat# 56-0381-82, RRID:AB_657740)  |
| LIVE/DEAD Fixable Aqua Dead Cell Stain Kit                                  | Invitrogen               | L34966 A                                                    |
| BV605 Rat Anti-Mouse I-A/I-E (Clone: M5/114.15.2)                           | BD Biosciences           | (BD Biosciences Cat# 563413, RRID:AB_2738190)               |
| Brilliant Violet 650 anti-mouse CD19 Antibody (Clone: 6D5)                  | BioLegend                | (BioLegend Cat# 115541, RRID:AB_11204087)                   |
| Alexa Fluor 350 Goat anti-Mouse IgG (H+L) Cross-Adsorbed Secondary Antibody | Thermo Fisher Scientific | (Thermo Fisher Scientific Cat# A-11045, RRID:AB_2534100)    |
| BV786 Rat Anti-Mouse CD4 (Clone: GK1.5)                                     | BD Biosciences           | (BD Biosciences Cat# 563331, RRID:AB_2738140)               |

|                                                                   |                          |                                                              |
|-------------------------------------------------------------------|--------------------------|--------------------------------------------------------------|
| BUV395 Rat Anti-Mouse CD8a (Clone: 53-6.7)                        | BD Biosciences           | (BD Biosciences Cat# 563786, RRID:AB_2732919)                |
| APC-eFluor 780 CD11c Antibody (Clone: N418)                       | Thermo Fisher Scientific | (Thermo Fisher Scientific Cat# 47-0114-82, RRID:AB_1548652)  |
| APC-eFluor 780 CD11b Antibody (Clone: M1/70)                      | Thermo Fisher Scientific | (Thermo Fisher Scientific Cat# 47-0112-82, RRID:AB_1603193)  |
| APC-eFluor 780 F4/80 Antibody (Clone: BM8)                        | Thermo Fisher Scientific | (Thermo Fisher Scientific Cat# 47-4801-82, RRID:AB_2735036)  |
| APC-eFluor 780 CD45R (B220) Antibody (Clone: RA3-6B2)             | Thermo Fisher Scientific | (Thermo Fisher Scientific Cat# 47-0452-82, RRID:AB_1518810)  |
| Brilliant Violet 421 anti-mouse CD25 Antibody (Clone: PC61)       | BioLegend                | (BioLegend Cat# 102034, RRID:AB_11203373)                    |
| Alexa Fluor 647 anti-mouse/rat/human FOXP3 Antibody (Clone: 150D) | BioLegend                | (BioLegend Cat# 320014, RRID:AB_439750)                      |
| PE/Cyanine7 anti-mouse CD357 (GITR) Antibody (Clone: YGITR765)    | BioLegend                | (BioLegend Cat# 120222, RRID:AB_528907)                      |
| PE Hamster Anti-Mouse CD154 (Clone: MR1)                          | BD Biosciences           | (BD Biosciences Cat# 553658, RRID:AB_394978)                 |
| APC Anti-BrdU (Clone BU20A)                                       | Thermo Fisher Scientific | (Thermo Fisher Scientific Cat# 17-5071-42, RRID:AB_11040534) |
| eFluor 450 GL7 Antibody (Clone: GL7)                              | Thermo Fisher Scientific | (Thermo Fisher Scientific Cat# 48-5902-82, RRID:AB_10870775) |
| UAE-1                                                             | Vector Laboratories      | (Vector Laboratories Cat# FL-1061, RRID:AB_2336767)          |
| Anti-β5t (Mouse) pAb                                              | MBL International        | (MBL International Cat# PD021, RRID:AB_2171885)              |
| Alexa Fluor 647 Rat Anti-mouse CD19 (Clone: 1D3)                  | BD Biosciences           | (BD Biosciences Cat# 557684, RRID:AB_396794)                 |
| PE-Cy7-SA PBS-57 tetramer                                         | NIH tetramer core        | -                                                            |



|                                                                        |                          |                                                          |
|------------------------------------------------------------------------|--------------------------|----------------------------------------------------------|
| Alexa Fluor 647 goat anti-mouse IgG2b                                  | Thermo Fisher Scientific | (Thermo Fisher Scientific Cat# A-21242, RRID:AB_2535811) |
| BV605 Rat Anti-Mouse IgG1 (Clone: A85-1)                               | BD Biosciences           | (BD Biosciences Cat# 563285, RRID:AB_2738116)            |
| BV510 Rat Anti-Mouse IgE (Clone: R35-72)                               | BD Biosciences           | (BD Biosciences Cat# 563097, RRID:AB_2738003)            |
| Goat pAb to Ms IgG2c (FITC)                                            | Abcam                    | (Abcam Cat# ab97254, RRID:AB_10679820)                   |
| Alexa Fluor 594 Goat anti-Mouse IgG3 Cross-Adsorbed Secondary Antibody | Thermo Fisher Scientific | (Thermo Fisher Scientific Cat# A-21155, RRID:AB_2535785) |
| Anti-Mouse CD16/CD32 (Fc Shield) (Clone: 2.4G2)                        | Tonbo Biosciences        | (Tonbo Biosciences Cat# 70-0161, RRID:AB_2621487)        |
| redFlour 710 Anti-Human/Mouse CD44 (Clone: IM7)                        | Tonbo Biosciences        | (Tonbo Biosciences Cat# 80-0441, RRID:AB_2621985)        |
| CountBright Absolute Counting Beads                                    | Thermo Fisher Scientific | C36950                                                   |
| Biotin anti-Mouse CD4 (Clone: GK1-5)                                   | BioLegend                | (BioLegend Cat# 100404, RRID:AB_312689)                  |
| Biotin anti-Mouse CD8 $\alpha$ (Clone: 53-6.7)                         | BioLegend                | (BioLegend Cat# 100704, RRID:AB_312743)                  |
| <b>Chemicals, peptides, and recombinant proteins</b>                   |                          |                                                          |
| Collagenase D                                                          | Roche                    | 11088882001                                              |
| Dnase I                                                                | Qiagen                   | 79254                                                    |
| DAPI                                                                   | Invitrogen               | D1306                                                    |
| BrdU                                                                   | Sigma-Aldrich            | B5002                                                    |
| Polymyxin B sulfate salt                                               | Sigma-Aldrich            | P4932                                                    |
| Neomycin trisulfate salt hydrate                                       | Sigma-Aldrich            | N6386                                                    |
| ProLong Diamond Antifade Moutant                                       | Thermo Fisher Scientific | P36961                                                   |
| HBSS with Ca <sup>2+</sup> ,Mg <sup>2+</sup>                           | Hyclone                  | SH30030.02                                               |
| HBSS without Ca <sup>2+</sup> ,Mg <sup>2+</sup>                        | Hyclone                  | SH30031.02                                               |
| EDTA (0.5M Solution/pH 8.0)                                            | Thermo Fisher Scientific | BP2482100                                                |
| HEPES (1M)                                                             | Thermo Fisher Scientific | 15630080                                                 |
| BSA                                                                    | Sigma-Aldrich            | A7906-500G                                               |
| O.C.T Compound                                                         | Sakura Finetek           | 4583                                                     |
| Acetone                                                                | Sigma-Aldrich            | 320110                                                   |
| TWEEN 20                                                               | Sigma-Aldrich            | P9416                                                    |
| PBS without Ca <sup>2+</sup> ,Mg <sup>2+</sup>                         | Corning                  | 21-040-CV                                                |
| Fetal Bovine Serum                                                     | Atlas Biologicals        | FS-0500-AD                                               |

|                                                                                      |                            |                       |
|--------------------------------------------------------------------------------------|----------------------------|-----------------------|
| Bovine Serum Albumin                                                                 | Sigma-Aldrich              | A7906                 |
| Complete Freund's Adjuvant                                                           | Sigma-Aldrich              | F5881                 |
| Cre <sup>61-71</sup> peptide (RKWFPAEPEDV)                                           | GenScript                  | (1)                   |
| L-Glutamine, 100x, Liquid                                                            | Corning                    | 25-005-CI             |
| RNAprotect Cell Reagent                                                              | Qiagen                     | 76526                 |
| D-glucose                                                                            | WVR                        | 4912                  |
| HEPES                                                                                | Thermo Fisher Scientific   | BP310-1               |
| <b>Critical commercial assays</b>                                                    |                            |                       |
| RNEasy Plus Mini Kit                                                                 | Qiagen                     | 74134                 |
| SuperScript III First-Strand Synthesis SuperMix for qRT-PCR                          | Thermo Fisher Scientific   | 11752050              |
| Fast SYBR Green Master Mix                                                           | Thermo Fisher Scientific   | 4385614               |
| CellTrace Violet Cell Proliferation Kit                                              | Thermo Fisher Scientific   | C34557                |
| CellTrace CFSE Cell Proliferation Kit                                                | Thermo Fisher Scientific   | C34554                |
| BD Cytotfix/Cytoperm                                                                 | BD                         | 554714                |
| Foxp3 / Transcription Factor Staining Buffer Kit                                     | Tonbo Biosciences          | NB-0607-KIT           |
| Anti-PE MicroBeads                                                                   | Miltenyi Biotec            | 130-105-639           |
| Anti-APC MicroBeads                                                                  | Miltenyi Biotec            | 130-090-855           |
| Anti-Biotin MicroBeads                                                               | Miltenyi Biotec            | 130-090-485           |
| Mouse B Cell Isolation Kit                                                           | StemCell Technologies      | 19854                 |
| <b>Deposited data</b>                                                                |                            |                       |
|                                                                                      |                            |                       |
| <b>Experimental models: Organisms/strains</b>                                        |                            |                       |
| B6.129S7- <i>Ifngr1</i> <sup>tm1Agt/J</sup> ( <i>Ifngr1</i> <sup>-/-</sup> )         | The Jackson Laboratory     | RRID:IMSR_JAX:003288  |
| B6.Cg- <i>Mx1</i> <sup>tm1.1Agsa/J</sup> ( <i>Mx1</i> <sup>gfp</sup> )               | A. García-Sastre           | RRID:IMSR_JAX:033219  |
| <i>Ifnlr1</i> <sup>tm1.1Svko</sup>                                                   | Sergei V Kotenko           | (2)                   |
| <i>Ifnlr1</i> <sup>tm1.2Svko</sup>                                                   | Sergei V Kotenko           | (2)                   |
| B6.SJL-Ptprc <sup>a</sup> Pepc <sup>b</sup> /BoyCrI (B6.SJL),                        | Charles River Laboratories | RRID:IMSR_CRL:494     |
| C57BL/6NCrI (B6)                                                                     | Charles River Laboratories | RRID:IMSR_CRL:027     |
| B6.C(Cg)- <i>Cd79a</i> <sup>tm1(cre)Reth/EhobJ</sup> ( <i>Cd79a</i> <sup>cre</sup> ) | The Jackson Laboratory     | RRID:IMSR_JAX:020505  |
| B6.Cg- <i>Tg(Cd4-cre)1Cwi/BfluJ</i> ( <i>Cd4</i> <sup>cre</sup> )                    | The Jackson Laboratory     | RRID:IMSR_JAX:022071  |
| B6.129S2- <i>Ifnar1</i> <sup>tm1Agt/Mmjax</sup> ( <i>Ifnar1</i> <sup>-/-</sup> )     | The Jackson Laboratory     | RRID:MMRRC_032045-JAX |
| B6.129S(Cg)- <i>Stat1</i> <sup>tm1Div/J</sup> ( <i>Stat1</i> <sup>-/-</sup> )        | The Jackson Laboratory     | RRID:IMSR_JAX:012606  |
| B6.129S2- <i>Tcra</i> <sup>tm1Mom/J</sup> ( <i>Tcra</i> <sup>-/-</sup> )             | The Jackson Laboratory     | RRID:IMSR_JAX:002116  |
| B6.Cg-Foxp3tm2Tch/J ( <i>Foxp3</i> <sup>eGFP</sup> )                                 | The Jackson Laboratory     | RRID:IMSR_JAX:006772  |

|                                                                                                   |                        |                                                                                   |
|---------------------------------------------------------------------------------------------------|------------------------|-----------------------------------------------------------------------------------|
| Tg(Tcrb51-11.5)AR1251Ayr (Tclib)                                                                  | N/A                    | (3)                                                                               |
| B6.129P2- <i>Aicda</i> <sup>tm1(cre)Mnz/J</sup>                                                   | The Jackson Laboratory | RRID:IMSR_JAX:007770                                                              |
| <b>Oligonucleotides</b>                                                                           |                        |                                                                                   |
| Ccl22                                                                                             | IDT                    | Mm.PT.58.15758573                                                                 |
| Cd40<br>Fwd- 5'-GTT TAA AGT CCC GGA TGC GA-3'<br>Rev-5'-CTC AAG GCT ATG CTG TCT GT-3'             | IDT                    | N/A                                                                               |
| Cd80<br>Fwd- 5'-GGC AAG GCA GCA ATA CCT TA-3'<br>Rev- 5'-CTC TTT GTG CTG CTG ATT CG-3'            | IDT                    | N/A                                                                               |
| Ly6c2<br>Fwd- 5'-GGA CAG TAC TCA CGC TAC AAA G-3'<br>Rev- 5'-ATT GGC ACT CCA TAG CAC TC-3'        | IDT                    | N/A                                                                               |
| Mx1<br>Fwd- 5'-CTC ACC TCC CAC ATC TGT AAA TC-3'<br>Rev- 5'-GTA TGT CTG CAC CGT ACT TCT G-3'      | IDT                    | N/A                                                                               |
| Irf7                                                                                              | IDT                    | MM.PT.58.32394021.G                                                               |
| Gapdh<br>Fwd- 5'-TGG CCT ACA TGG CCT CCA-3'<br>Rev- 5'-TCC CTA GGC CCC TCC TGT TAT-3'             | IDT                    | N/A                                                                               |
| Ifnlr1<br>Fwd- 5'-GCT CTG AGG CTG GCA TAA A-3'<br>Rev- 5'-CTG GTA GTG TTA GGA AGG TTG AG-3'       | IDT                    | N/A                                                                               |
| Aire<br>Fwd- 5'- TGC ATA GCA TCC TGG ACG GCT TCC-3'<br>Rev- 5'-CCT GGG CTG GAG ACG CTC TTT GAG-3' | IDT                    | N/A                                                                               |
| <b>Software and algorithms</b>                                                                    |                        |                                                                                   |
| R                                                                                                 | R version 4.1.0        | R Project for Statistical Computing (RRID:SCR_001905)                             |
| CHURP                                                                                             | CHURP v0.2.1           | <a href="https://github.com/m-si-ris/CHURP">https://github.com/m-si-ris/CHURP</a> |
| Prism                                                                                             | Version 9.3.1          | PRISM (RRID:SCR_005375)                                                           |
| <b>Other</b>                                                                                      |                        |                                                                                   |
|                                                                                                   |                        |                                                                                   |

**Supplemental Table 1. Materials**

### SI References

1. F. P. Legoux, *et al.*, CD4 + T Cell Tolerance to Tissue-Restricted Self Antigens Is Mediated by Antigen-Specific Regulatory T Cells Rather Than Deletion. *Immunity* **43**, 896–908 (2015).
2. J.-D. Lin, *et al.*, Distinct Roles of Type I and Type III Interferons in Intestinal Immunity to Homologous and Heterologous Rotavirus Infections. *PLoS Pathog* **12**, e1005600 (2016).
3. P. Wong, A. W. Goldrath, A. Y. Rudensky, Competition for Specific Intrathymic Ligands Limits Positive Selection in a TCR Transgenic Model of CD4 + T Cell Development. *J Immunol* **164**, 6252–6259 (2000).
